# Supplementary material for: Genetic Variation at Nuclear Loci Fails to Distinguish Two Morphologically Distinct Species of Aquilegia
Source: PubMed Central journal article supplement (PMC2808223; doi:10.1371/journal.pone.0008655), 2010-01-19
Supplement: pone.0008655.s005.pdf [file pone.0008655.s005.pdf]

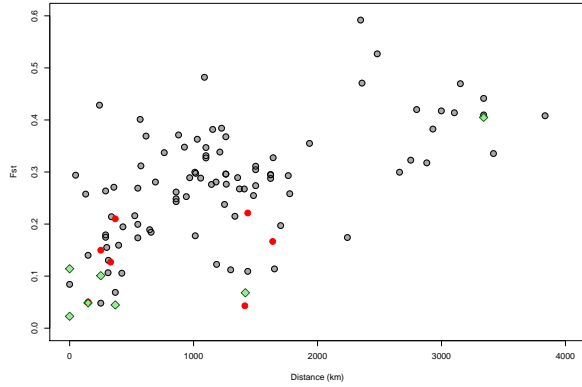

(a) Within vs. Between Species

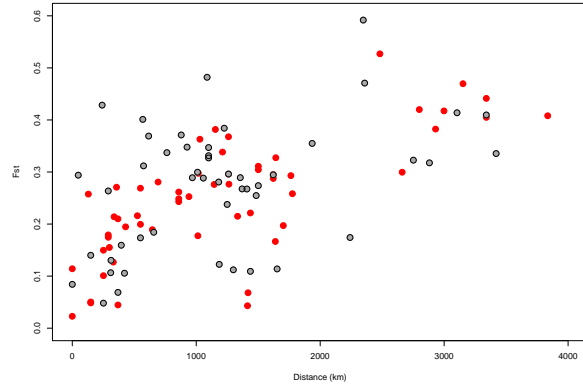

(b) Same vs. Different Pollinator Syndrome

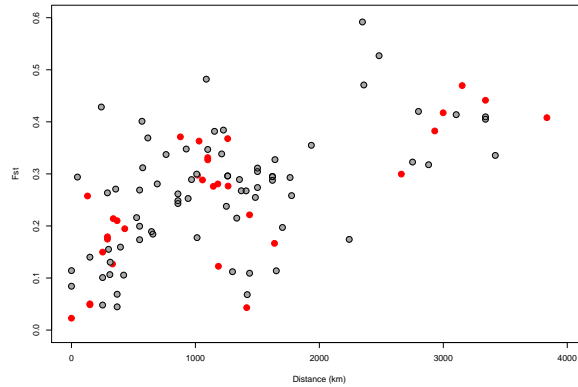

(c) Same vs. Different Habitat Type

Figure S5: **Other factors influencing  $F_{ST}$  in *Aquilegia*.** In all panels, red dots indicate comparisons where both populations were the same for the factor being considered, while gray dots indicate comparisons where the two populations were different. Panel (A) shows  $F_{ST}$  vs distance both within and between species, with the green diamonds indicating comparisons between either *A. formosa* or *A. pubescens* and one of the natural hybrid populations. Panel (B) shows  $F_{ST}$  vs distance with the same and different pollinator syndrome, while Panel (C) shows the same comparisons for habitat type.
