# Supplementary material for: Genetic Variation at Nuclear Loci Fails to Distinguish Two Morphologically Distinct Species of Aquilegia
Source: PubMed Central journal article supplement (PMC2808223; doi:10.1371/journal.pone.0008655), 2010-01-19
Supplement: pone.0008655.s007.pdf [file pone.0008655.s007.pdf]

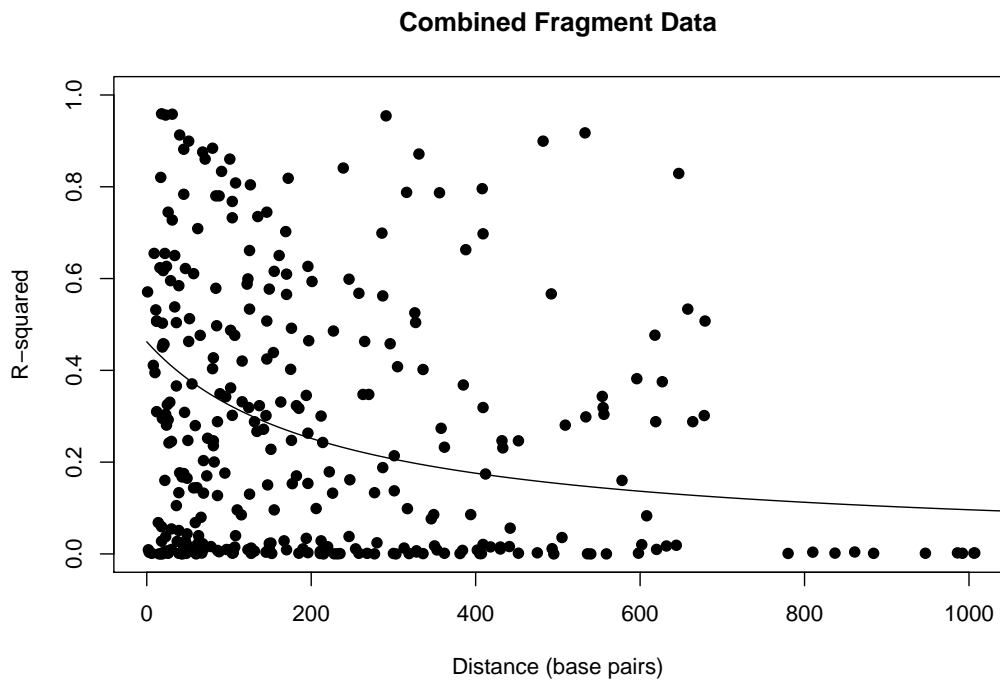

Figure S7:  $R^2$  versus distance for the combined data. Only SNPs with a minor allele frequency  $\geq 10\%$  were used in pairwise comparisons. Trend line was fitted as described in the Methods section.
