# Supplementary material for: Genetic Variation at Nuclear Loci Fails to Distinguish Two Morphologically Distinct Species of Aquilegia
Source: PubMed Central journal article supplement (PMC2808223; doi:10.1371/journal.pone.0008655), 2010-01-19
Supplement: pone.0008655.s008.pdf [file pone.0008655.s008.pdf]

**Table S1:** Summary of *Aquilegia* samples used in this study.

| Species                                 | Population                  | Num. Individuals | Sample |
|-----------------------------------------|-----------------------------|------------------|--------|
| <i>A. barnebyi</i>                      | Rifle Falls, CO             | 3                | Second |
| <i>A. brevistyla</i>                    | Alberta, Canada             | 5                | Second |
| <i>A. canadensis</i>                    | Kimbalton, Virginia         | 5                | Second |
| <i>A. canadensis</i>                    | Ontario, Canada             | 5                | Second |
| <i>A. chaplensei</i>                    | Sitting Bull Falls, NM      | 5                | Second |
| <i>A. chrysantha</i>                    | Ash Canyon, NM              | 5                | Second |
| <i>A. chrysantha</i>                    | El Salto, NM                | 4                | Second |
| <i>A. coerulea</i> var. <i>alpina</i>   | Jackson Hole, WY            | 5                | Second |
| <i>A. coerulea</i> var. <i>coerulea</i> | Loveland Pass, CO           | 5                | Second |
| <i>A. coerulea</i> var. <i>coerulea</i> | Sugarloaf, WY               | 5                | Second |
| <i>A. coerulea</i> var. <i>coerulea</i> | Tony Grove, UT              | 5                | Second |
| <i>A. pinetorum</i>                     | Sawmill, AZ                 | 5                | Second |
| <i>A. desertorum</i>                    | Horse Spring, AZ            | 1                | Second |
| <i>A. elegantula</i>                    | Hyde Memorial, NM           | 5                | Second |
| <i>A. eximia</i>                        | Porter Camp, CA             | 2                | Second |
| <i>A. flavescens</i>                    | High Creek, UT              | 5                | Second |
| <i>A. formosa</i>                       | Alaska                      | 1                | First  |
| <i>A. formosa</i>                       | Bass Lake, CA               | 5                | Second |
| <i>A. formosa</i>                       | Bishop Creek, CA            | 5                | First  |
| <i>A. formosa</i>                       | Cascades, WA                | 5                | First  |
| <i>A. formosa</i>                       | Fresno, CA                  | 5                | First  |
| <i>A. formosa</i>                       | Las Vegas, NV               | 5                | First  |
| <i>A. formosa</i>                       | Po Island, British Columbia | 5                | Second |
| <i>A. formosa</i>                       | Po Island, British Columbia | 5                | First  |
| <i>A. formosa</i>                       | Upper Lehman Creek, NV      | 5                | Second |
| <i>A. formosa</i>                       | Upper Lehman Creek, NV      | 10               | First  |
| <i>A. formosa</i>                       | Ventura, CA                 | 4                | First  |
| <i>A. formosa</i>                       | White Mountains, CA         | 5                | First  |
| <i>A. hinckleyana</i>                   | Capote Falls, TX            | 5                | Second |
| <i>A. jonesii</i>                       | Medicine Wheel, WY          | 2                | Second |
| <i>A. laramiensis</i>                   | Friend Camp, WY             | 2                | Second |
| <i>A. longissima</i>                    | Baboquivari, AZ             | 4                | Second |
| <i>A. longissima</i>                    | Maple, TX                   | 5                | Second |
| <i>A. micrantha</i>                     | Escalante, CO               | 5                | Second |
| <i>A. pubescens</i>                     | Lamarck Trail, CA           | 16               | First  |
| <i>A. pubescens</i>                     | Morgan Pass, CA             | 4                | First  |
| <i>A. pubescens</i>                     | Piute Pass Trail, CA        | 5                | Second |
| <i>A. pubescens</i>                     | Piute Pass Trail, CA        | 15               | First  |

**Supp. Table 1:** continued

| Species                                         | Population                         | Num. Individuals | Sample |
|-------------------------------------------------|------------------------------------|------------------|--------|
| <i>A. saximontana</i>                           | Pikes Peak, CO                     | 5                | Second |
| <i>A. scopulorum</i>                            | Charleston Peak, NV                | 5                | Second |
| <i>A. shockleyi</i>                             | Charleston Library, NV             | 5                | Second |
| <i>A. skinneri</i>                              | Mesa del Campanero, Sonora, Mexico | 5                | Second |
| <i>A. triternata</i>                            | Zion, UT                           | 5                | Second |
| <i>A. caucasica</i>                             | Europe                             | 1                | Second |
| <i>A. flabellata</i>                            | Japan                              | 3                | Second |
| <i>A. fragrans</i>                              | Europe                             | 1                | Second |
| <i>A. glandulosa</i>                            | Asia                               | 1                | Second |
| <i>A. olympica</i>                              | Europe                             | 2                | Second |
| <i>A. pyrenaica</i>                             | Europe                             | 2                | Second |
| <i>A. viridiflora</i>                           | Siberia                            | 3                | Second |
| Hybrids ( <i>formosa</i> and <i>pubescens</i> ) | Lamarck Lakes, CA                  | 11               | First  |
| Hybrids ( <i>formosa</i> and <i>pubescens</i> ) | Piute, CA                          | 5                | First  |
| <i>Sp. nov.</i>                                 | Stella Lakes, NV                   | 5                | Second |
