# Supplementary material for: Genetic Variation at Nuclear Loci Fails to Distinguish Two Morphologically Distinct Species of Aquilegia
Source: PubMed Central journal article supplement (PMC2808223; doi:10.1371/journal.pone.0008655), 2010-01-19
Supplement: pone.0008655.s009.pdf [file pone.0008655.s009.pdf]

**Table S2:** Primer pairs used to amplify the 9 nuclear loci

| Locus                                              | Fragment Size (bp) | Primers (Forward=top; Reverse=bottom)              |
|----------------------------------------------------|--------------------|----------------------------------------------------|
| Acetyl-CoA<br>carboxylase (Acetyl)                 | 577                | ATTCGCGGAGCTACATGATA<br>CCTACTGCTACTTTCAACAATCAAC  |
| Defensin protein (DEFEN)                           | 683                | GCAACATGCGTCTAGTTTCAG<br>GAACCACGAAGGTGACCCT       |
| Glyceraldehyde-3-phosphate<br>dehydrogenase (GAPC) | 1097               | GTCTGAGGGCAAACCTGAAGG<br>AAACCTGAAGCAGCAATAGGA     |
| Histone H3                                         | 358                | CAAACCTCCCTTCCAACGTC<br>AACTTCCGATATATTTTCATTCATTG |
| HSP70-1 (HEAT)                                     | 1281               | TCTTCAGGGAGAGAGAGAGTTTG<br>ATTACTTCCCACCATCAGG     |
| Apetala-III (AP3)                                  | 1093               | TGAGTCTGTGAAACTTGTTTCGGG<br>GCAATGCGAATAGCAATGCC   |
| LFY                                                | 575                | CCCAACCAAGGTATGAATA<br>CCTGAATTGCATGTCGATACAC      |
| Pistalla-AqaPI-1 (Pist)                            | 1200               | CGAACTCAGGCACTTGAAGG<br>GCATTGTTGAATGTTGATACTCT    |
| Glycosyl transferase (UF3GT)                       | 473                | GAGGAAGCTTTGCCAGAGG<br>AAATGCGACACTGCGACATA        |
