# Supplementary material for: Genetic Variation at Nuclear Loci Fails to Distinguish Two Morphologically Distinct Species of Aquilegia
Source: PubMed Central journal article supplement (PMC2808223; doi:10.1371/journal.pone.0008655), 2010-01-19
Supplement: pone.0008655.s010.pdf [file pone.0008655.s010.pdf]

**Table S3:** Positions of introns, exons, and UTRs in Each Locus

| Locus  | Exon Positions                         | Intron Positions              | UTR Positions |
|--------|----------------------------------------|-------------------------------|---------------|
| Acetyl | 1...389, 485...542                     | 390...484                     | 543...577     |
| DEFEN  | 1...38, 389...560                      | 39...388                      | 561...683     |
| GAPC   | 1...59, 231...318, 844...888           | 60...230, 319...843           | 889...1097    |
| H3     | 1...200                                | ...                           | 201...358     |
| HEAT   | 1...192, 477...482, 930...773          | 193...476, 483...929          | 774...1281    |
| AP3    | 1...6, 120...163, 542...587, 678...832 | 7...119, 164...541, 588...677 | 833...1093    |
| LFY    | ...                                    | 1...575                       | ...           |
| Pist   | 1...762                                | 763...945                     | 946...1200    |
| UF3GT  | 1...424                                | ...                           | 425...473     |
