# Supplementary material for: Genetic Variation at Nuclear Loci Fails to Distinguish Two Morphologically Distinct Species of Aquilegia
Source: PubMed Central journal article supplement (PMC2808223; doi:10.1371/journal.pone.0008655), 2010-01-19
Supplement: pone.0008655.s011.pdf [file pone.0008655.s011.pdf]

**Table S4:** Levels of polymorphism for synonymous and nonsynonymous sites

| Fragment      | Synonymous |            |            |            | Nonsynonymous |            |            |            |
|---------------|------------|------------|------------|------------|---------------|------------|------------|------------|
|               | $\theta_W$ |            | $\Pi$      |            | $\theta_W$    |            | $\Pi$      |            |
|               | <i>A.f</i> | <i>A.p</i> | <i>A.f</i> | <i>A.p</i> | <i>A.f</i>    | <i>A.p</i> | <i>A.f</i> | <i>A.p</i> |
| <i>Acetyl</i> | 0.0010     | 0.0011     | 0.0013     | 0.0013     | 0.0013        | 0.0022     | 0.0012     | 0.0009     |
| <i>AP3</i>    | 0.0037     | 0.0041     | 0.0022     | 0.0017     | 0             | 0          | 0          | 0          |
| <i>DEFEN</i>  | 0.0046     | 0.0034     | 0.0026     | 0.0021     | 0             | 0.0079     | 0          | 0.0015     |
| <i>Gapc</i>   | 0.0061     | 0.0049     | 0.0018     | 0.0014     | 0.0118        | 0.010      | 0.0016     | 0.0042     |
| <i>H3</i>     | 0.0069     | 0.0087     | 0.0015     | 0.0021     | 0.0092        | 0.0081     | 0.0029     | 0.0044     |
| <i>Heat</i>   | 0.0063     | 0.0073     | 0.0038     | 0.0043     | 0.0017        | 0.0035     | 0.0006     | 0.0012     |
| <i>Pist</i>   | 0.0023     | 0.0009     | 0.0003     | 0.0001     | 0.0010        | 0          | 0.0002     | 0          |
| <i>UF3GT</i>  | 0.0215     | 0.0211     | 0.0053     | 0.0047     | 0.0109        | 0.0101     | 0.0055     | 0.0043     |

Note that *LFY* is not listed in this table because it did not contain any nonsynonymous sites.
